# Supplementary material for: Highly stable and efficient all-inorganic lead-free perovskite solar cells with native-oxide passivation
Source: PubMed Central journal article supplement (PMC6318336; doi:10.1038/s41467-018-07951-y), 2019-01-03
Supplement: 41467_2018_7951_MOESM1_ESM.pdf [file 41467_2018_7951_MOESM1_ESM.pdf]

Supplementary Information

**Highly Stable and Efficient All-Inorganic Lead-Free  
Perovskite Solar Cells with Native-Oxide Passivation**

Chen et al

## Supplementary Information

### Highly Stable and Efficient All-Inorganic Lead-Free Perovskite Solar Cells with Native-Oxide Passivation

Min Chen,<sup>1</sup> Ming-Gang Ju,<sup>2</sup> Hector F. Garces,<sup>1</sup> Alexander D Carl,<sup>3</sup> Katsuya Ono,<sup>4</sup> Zafer Hawash,<sup>4</sup> Yi Zhang,<sup>1</sup> Tianyi Shen,<sup>1</sup> Yabing Qi,<sup>4</sup> Ronald L. Grimm,<sup>3</sup> Domenico Pacifici,<sup>1</sup> Xiao Cheng Zeng,<sup>2</sup> Yuanyuan Zhou,<sup>1,\*</sup> Nitin P. Padture<sup>1,\*</sup>

<sup>1</sup> School of Engineering, Brown University, Providence, Rhode Island 02912, United States

<sup>2</sup> Department of Chemistry, University of Nebraska–Lincoln, Lincoln, Nebraska 68588, United States

<sup>3</sup> Department of Chemistry and Biochemistry, Worcester Polytechnic Institute, Worcester, MA 01609, United States

<sup>4</sup> Energy Materials and Surface Sciences Unit, Okinawa Institute of Science and Technology Graduate University, Okinawa 904-0495, Japan

\*Contact: [yuanyuan\\_zhou@brown.edu](mailto:yuanyuan_zhou@brown.edu) (Y.Z.); [nitin\\_padture@brown.edu](mailto:nitin_padture@brown.edu) (N.P.P.);

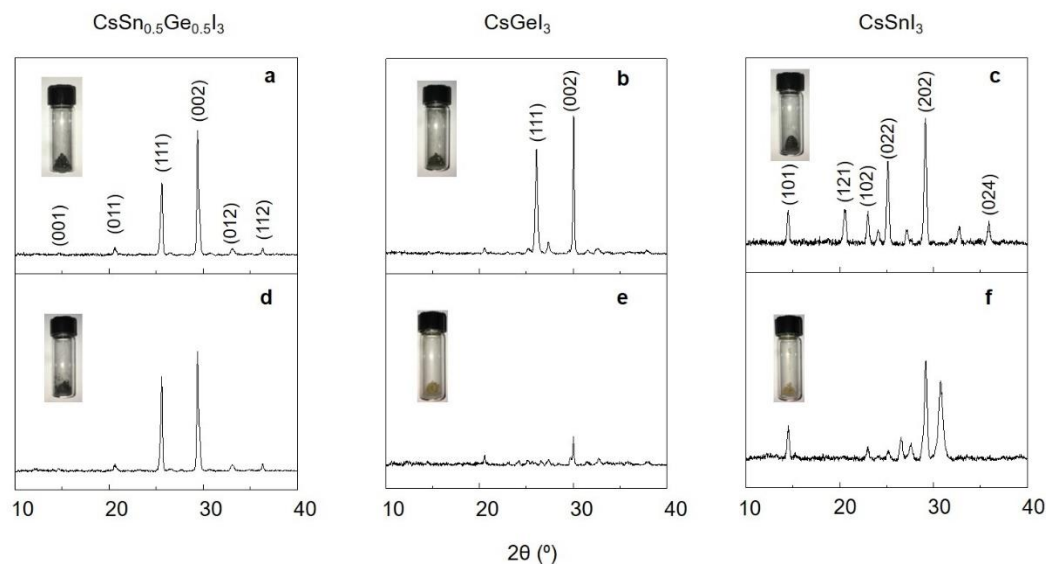

**Supplementary Figure 1. Relative stability CsSn<sub>0.5</sub>Ge<sub>0.5</sub>I<sub>3</sub>, CsGeI<sub>3</sub> and CsSnI<sub>3</sub>.** (a, b, c) XRD patterns of as-synthesized CsSn<sub>0.5</sub>Ge<sub>0.5</sub>I<sub>3</sub>, CsGeI<sub>3</sub> and CsSnI<sub>3</sub> powders, respectively. (d, e, f) XRD patterns of CsSn<sub>0.5</sub>Ge<sub>0.5</sub>I<sub>3</sub>, CsGeI<sub>3</sub>, and CsSnI<sub>3</sub> powders after 24-h exposure to air (25 °C, 80% RH), respectively. Insets: photograph of the respective powders.

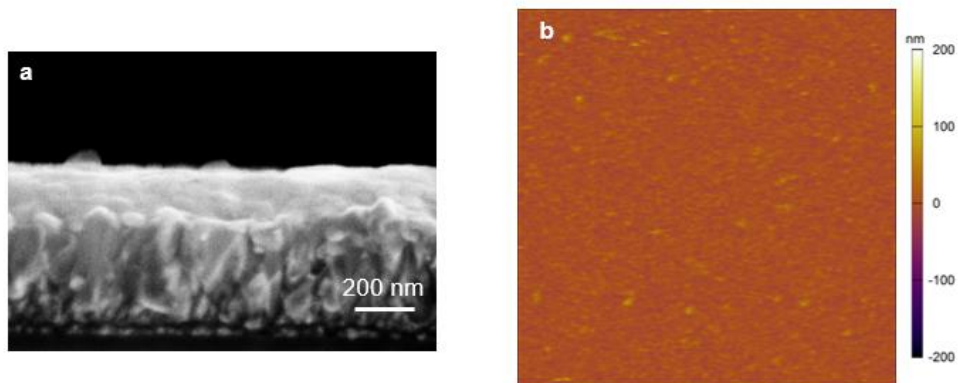

**Supplementary Figure 2. Thin film morphology characterization.** (a) Cross-sectional SEM of the CsSn<sub>0.5</sub>Ge<sub>0.5</sub>I<sub>3</sub> perovskite thin film. (b) Top-surface AFM image of the CsSn<sub>0.5</sub>Ge<sub>0.5</sub>I<sub>3</sub> perovskite thin film over a 50×50-μm<sup>2</sup> area.

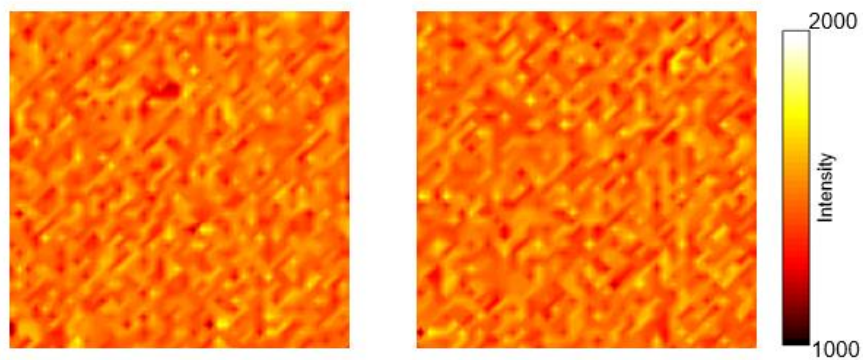

**Supplementary Figure 3. PL mapping.** PL maps over  $50 \times 50\text{-}\mu\text{m}^2$  areas from two different regions in the same CsSn<sub>0.5</sub>Ge<sub>0.5</sub>I<sub>3</sub> perovskite thin film.

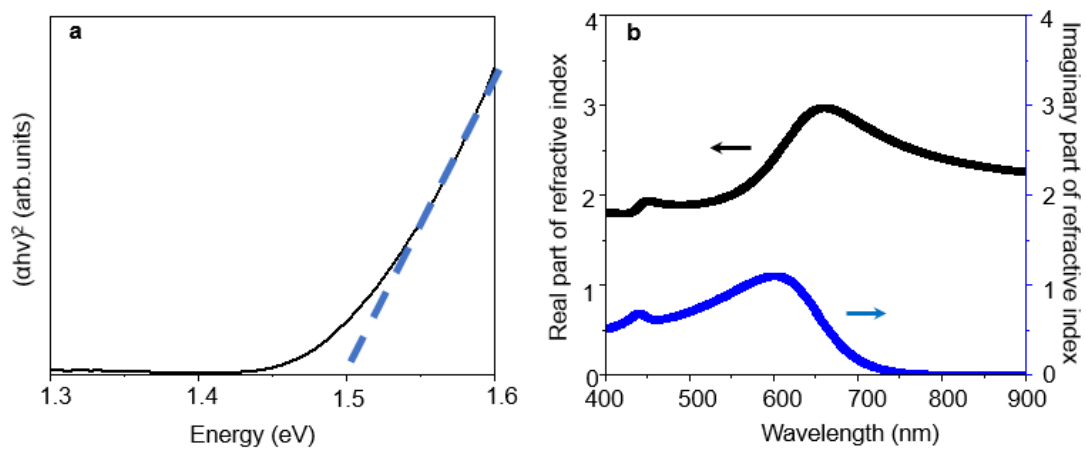

**Supplementary Figure 4. Optical characterization.** (a) Tauc plot of the  $\text{CsSn}_{0.5}\text{Ge}_{0.5}\text{I}_3$  perovskite thin film. (b) Refractive index of the  $\text{CsSn}_{0.5}\text{Ge}_{0.5}\text{I}_3$  perovskite thin film fitted from the ellipsometry data.

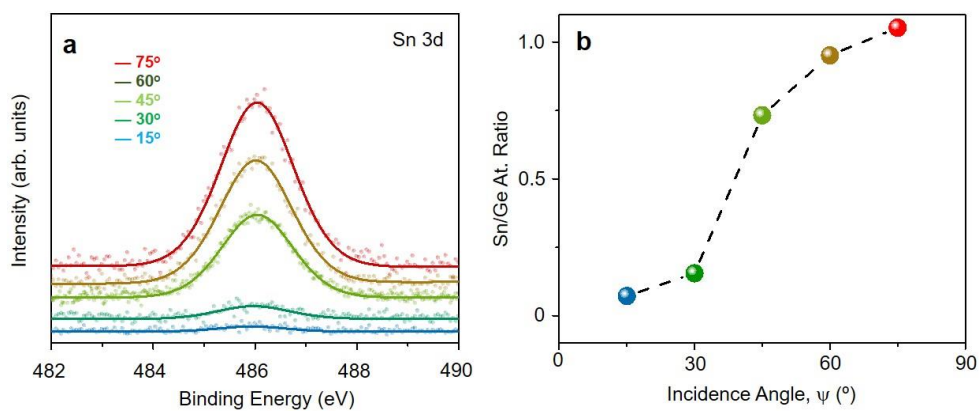

**Supplementary Figure 5. XPS characterization.** (a) Sn 3d XPS spectra, at different incidence angles, from CsSn<sub>0.5</sub>Ge<sub>0.5</sub>I<sub>3</sub> perovskite thin film that has been exposed to air. (b) Sn:Ge atomic ratio extracted from the Ge 3d and Sn 3d XPS data at different incidence angles.

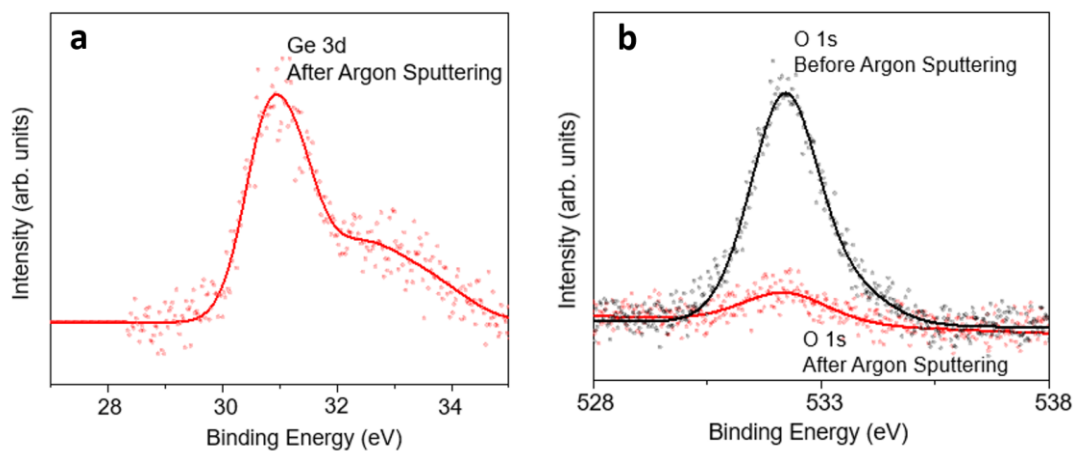

**Supplementary Figure 6. XPS characterization.** (a) XPS spectrum (Ge 3d) of  $\text{CsSn}_{0.5}\text{Ge}_{0.5}\text{I}_3$  perovskite thin film (incidence angle:  $15^\circ$ ) after 15-s Ar-sputtering. (b) XPS spectra (O 1s) of  $\text{CsSn}_{0.5}\text{Ge}_{0.5}\text{I}_3$  perovskite thin film (incidence angle:  $15^\circ$ ) before (black) and after (red) 15-s Ar-sputtering.

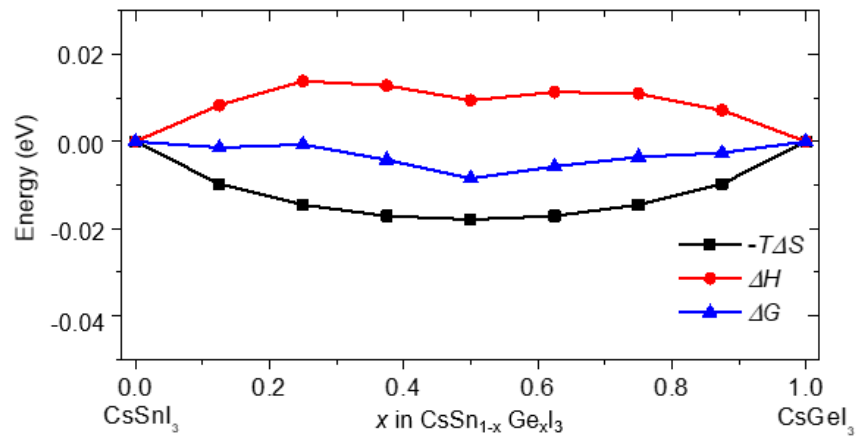

**Supplementary Figure 7. Energy calculations.** Calculated enthalpy, entropy, and Gibbs free energy at 300 K for CsSn<sub>1-x</sub>Ge<sub>x</sub>I<sub>3</sub> as a function of  $x$ . For simplicity, the CsSn<sub>0.5</sub>Ge<sub>0.5</sub>I<sub>3</sub> phase was assigned to have the space group of ***R3m***.



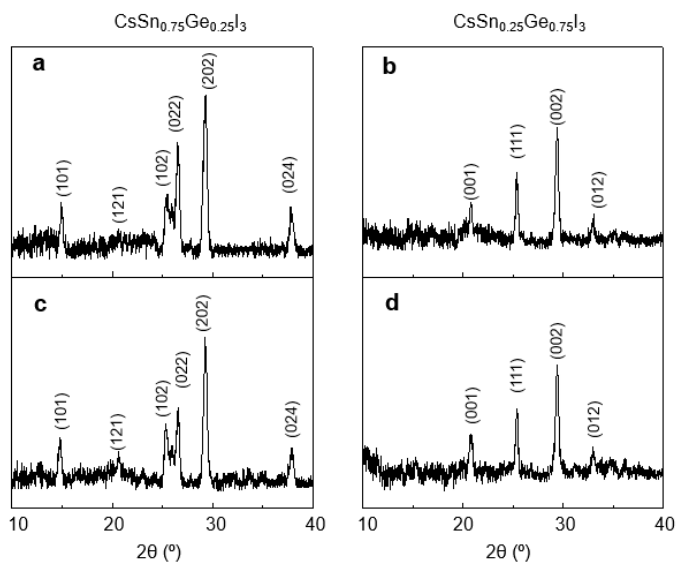

**Supplementary Figure 8. Relative stability of  $\text{CsSn}_{0.75}\text{Ge}_{0.25}\text{I}_3$  and  $\text{CsSn}_{0.25}\text{Ge}_{0.75}\text{I}_3$ .** (a, b) XRD patterns of as-synthesized  $\text{CsSn}_{0.75}\text{Ge}_{0.25}\text{I}_3$  and  $\text{CsSn}_{0.25}\text{Ge}_{0.75}\text{I}_3$  powders, respectively. (c, d) XRD patterns of  $\text{CsSn}_{0.75}\text{Ge}_{0.25}\text{I}_3$  and  $\text{CsSn}_{0.25}\text{Ge}_{0.75}\text{I}_3$  powders after 24-h exposure to air (25 °C, 80% RH), respectively.

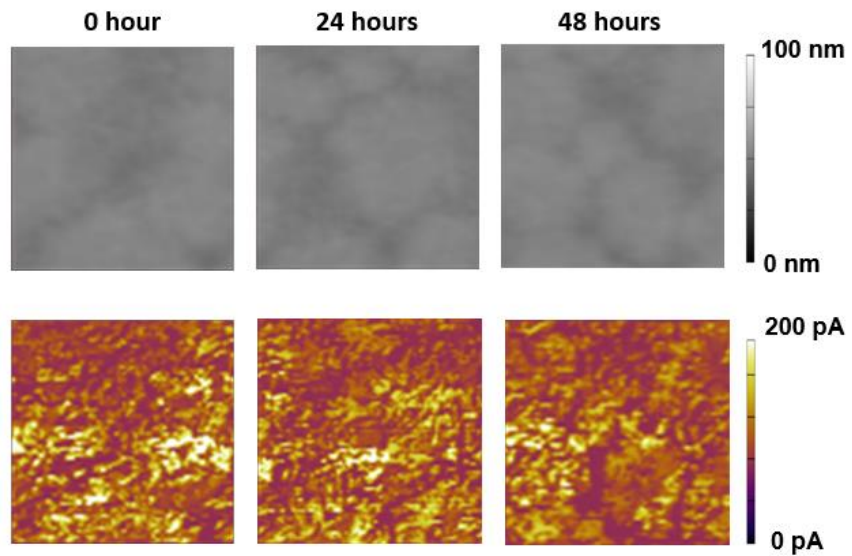

**Supplementary Figure 9. AFM and *c*-AFM mapping.** AFM topography (top) and corresponding *c*-AFM (bottom) maps over a  $5 \times 5\text{-}\mu\text{m}^2$  area of the  $\text{CsSn}_{0.5}\text{Ge}_{0.5}\text{I}_3$  perovskite thin film exposed to air for 0, 24 h, and 48 h.

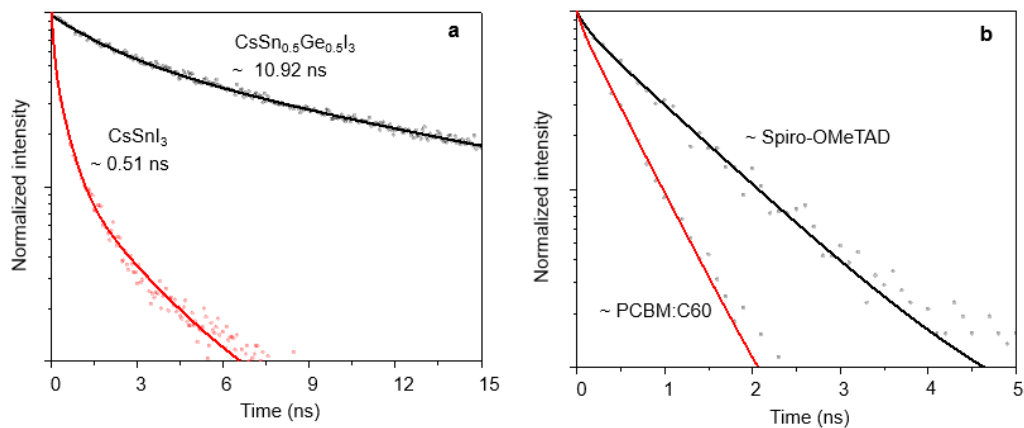

**Supplementary Figure 10. TRPL spectroscopy.** (a) TRPL results from the CsSn<sub>0.5</sub>Ge<sub>0.5</sub>I<sub>3</sub> and the CsSnI<sub>3</sub> perovskite thin film (thickness ~200 nm on glass substrates). (b) PL decay dynamics of the CsSn<sub>0.5</sub>Ge<sub>0.5</sub>I<sub>3</sub> perovskite thin films coated with an electron (PCBM:C<sub>60</sub>) or a hole quenching (Spiro-OMeTAD) layer.

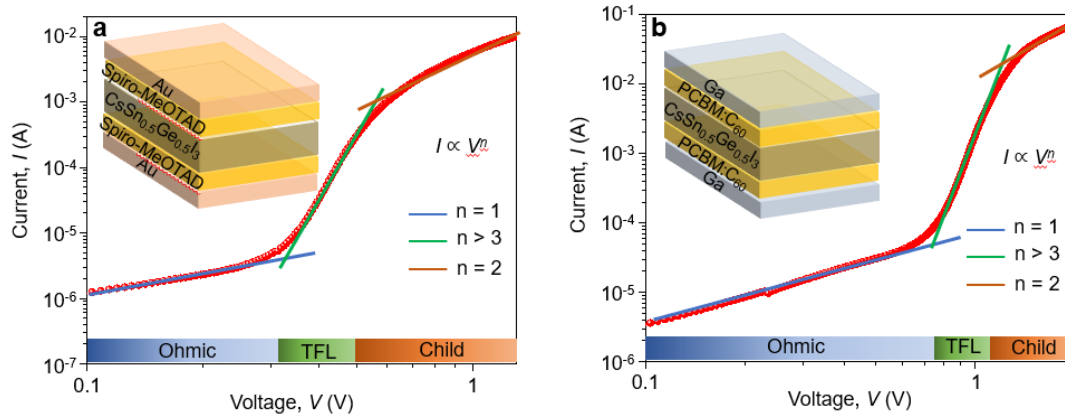

**Supplementary Figure 11. Film electrical properties.** *I-V* characteristics of  $\text{CsSn}_{0.5}\text{Ge}_{0.5}\text{I}_3$  perovskite thin films for (a) hole-only transport (b) electron-only transport. Insets: the respective device architectures used.

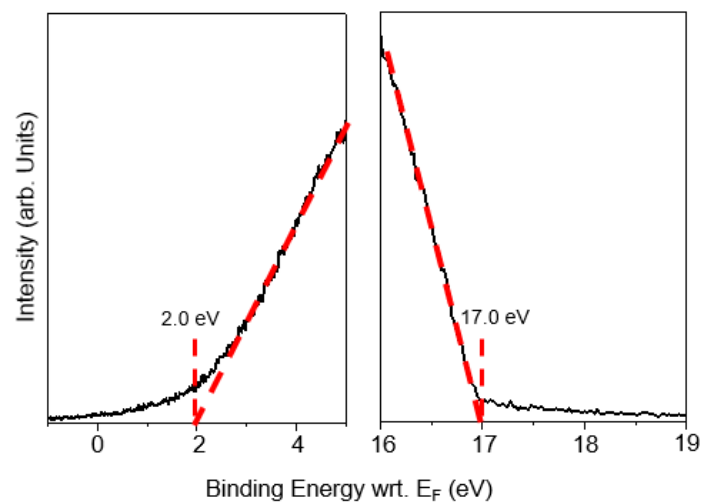

**Supplementary Figure 12. UPS characterization.** UPS data from the native oxide on the  $\text{CsSn}_{0.5}\text{Ge}_{0.5}\text{I}_3$  perovskite thin film.

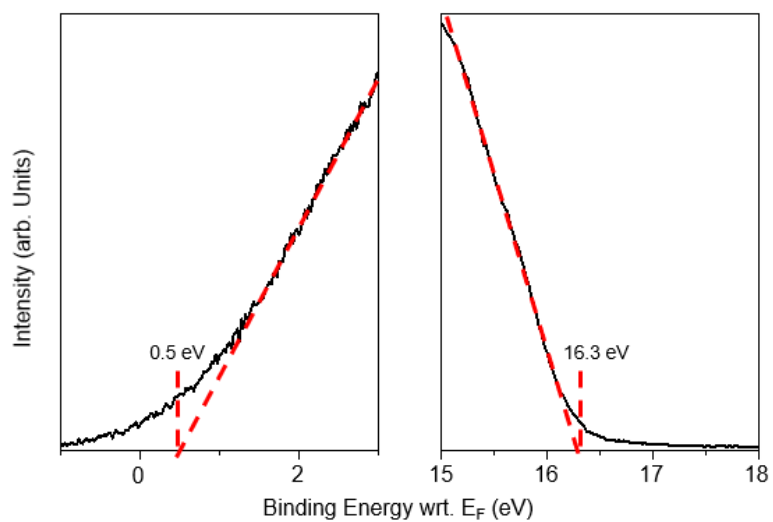

**Supplementary Figure 13. UPS characterization.** UPS data from the CsSn<sub>0.5</sub>Ge<sub>0.5</sub>I<sub>3</sub> perovskite thin film after 15-s Ar-sputtering.

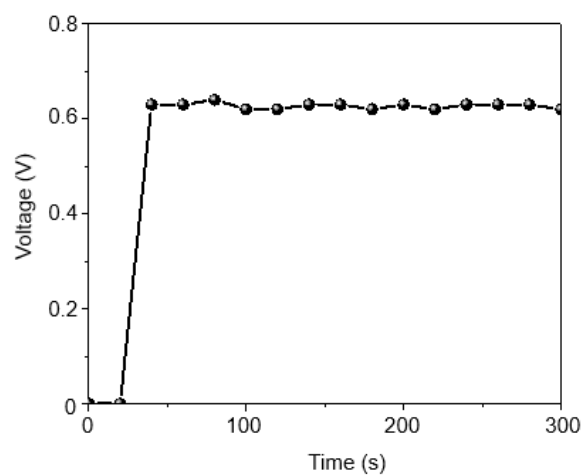

**Supplementary Figure 14.  $V_{OC}$  stability.** The stability of the  $V_{OC}$  of the PSC based on the  $\text{CsSn}_{0.5}\text{Ge}_{0.5}\text{I}_3$  perovskite thin film. The  $V_{OC}$  has been determined every other 20 seconds.

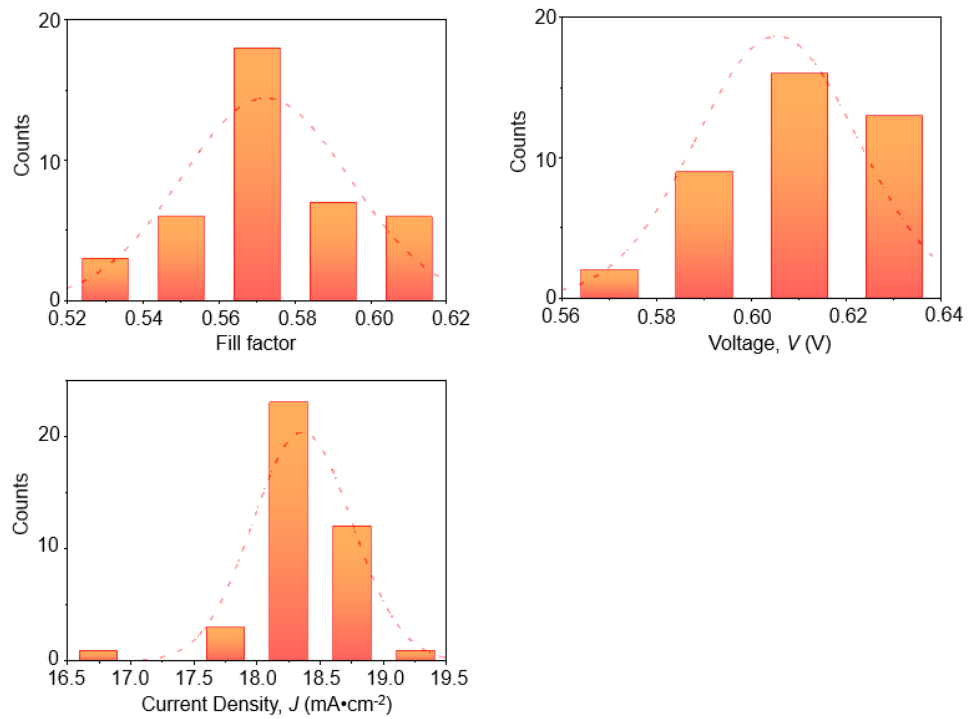

**Supplementary Figure 15. Performance statistics.** Detailed statistics of  $J_{SC}$ ,  $V_{OC}$  and FF from 40 CsSn<sub>0.5</sub>Ge<sub>0.5</sub>I<sub>3</sub>-based PSCs.



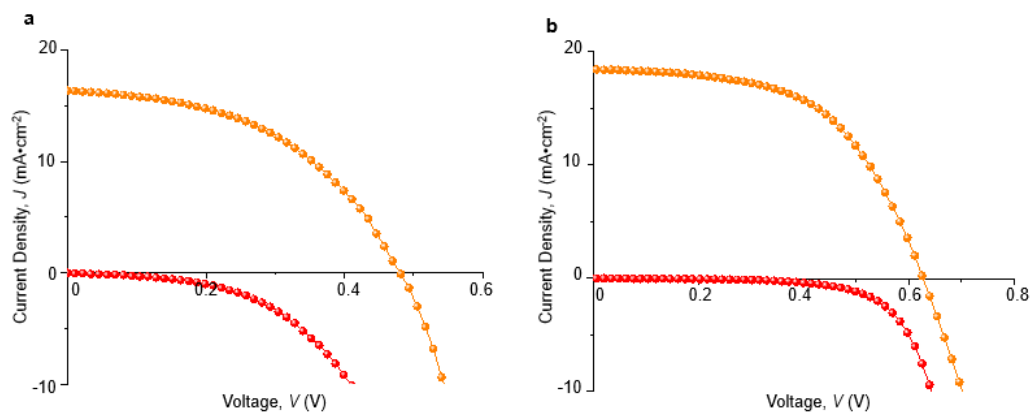

**Supplementary Figure 16. Performance of PSCs based on CsSn<sub>0.5</sub>Ge<sub>0.5</sub>I<sub>3</sub> perovskite thin films.**  $J$ - $V$  responses (reverse scan) under 1-sun and in 'dark': (a) PSC without native oxide fabricated inside a N<sub>2</sub>-filled glovebox (O<sub>2</sub> and H<sub>2</sub>O levels <0.1ppm) and (b) PSC with native oxide fabricated in ambient atmosphere.

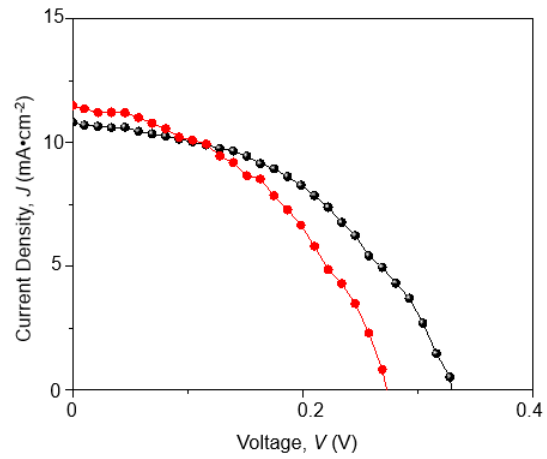

**Supplementary Figure 17. Performance of CsSnI<sub>3</sub>-based PSCs.**  $J$ - $V$  curves of CsSnI<sub>3</sub>-based PSCs fabricated using the similar single-source evaporation method that is used for CsSn<sub>0.5</sub>Ge<sub>0.5</sub>I<sub>3</sub> in this work (red: forward scan, black: reverse scan).

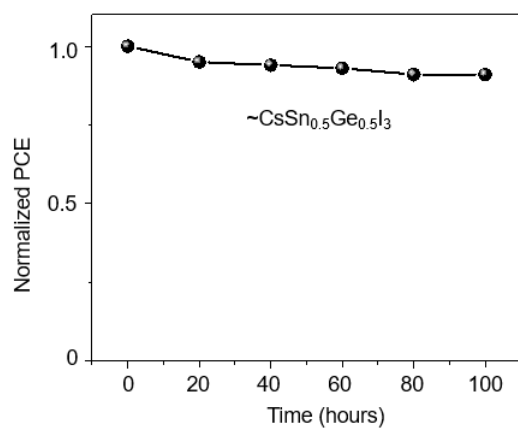

**Supplementary Figure 18. Air-stability.** PCE Stability of CsSn<sub>0.5</sub>Ge<sub>0.5</sub>I<sub>3</sub>-based PSCs (unencapsulated) under continuous light illumination in the ambient air.

**Supplementary Table 1.** *J-V* parameters of the 40 PSC devices used for the statistics.

| Device No. | $V_{oc}$ (V) | FF    | $J_{sc}$ ( $\text{mA}\cdot\text{cm}^{-2}$ ) | PCE (%) |
|------------|--------------|-------|---------------------------------------------|---------|
| 1          | 0.59         | 0.562 | 18.457                                      | 6.119   |
| 2          | 0.59         | 0.556 | 18.625                                      | 6.11    |
| 3          | 0.59         | 0.544 | 18.351                                      | 5.89    |
| 4          | 0.59         | 0.544 | 18.164                                      | 5.83    |
| 5          | 0.58         | 0.544 | 17.653                                      | 5.57    |
| 6          | 0.58         | 0.536 | 17.884                                      | 5.559   |
| 7          | 0.57         | 0.536 | 18.198                                      | 5.56    |
| 8          | 0.57         | 0.536 | 16.758                                      | 5.119   |
| 9          | 0.63         | 0.613 | 18.41                                       | 7.11    |
| 10         | 0.63         | 0.613 | 18.255                                      | 7.049   |
| 11         | 0.63         | 0.608 | 18.379                                      | 7.039   |
| 12         | 0.63         | 0.608 | 18.353                                      | 7.029   |
| 13         | 0.63         | 0.608 | 18.248                                      | 6.99    |
| 14         | 0.62         | 0.605 | 18.261                                      | 6.85    |
| 15         | 0.62         | 0.595 | 18.181                                      | 6.707   |
| 16         | 0.62         | 0.592 | 18.526                                      | 6.8     |
| 17         | 0.62         | 0.592 | 18.472                                      | 6.78    |
| 18         | 0.59         | 0.562 | 18.456                                      | 6.119   |
| 19         | 0.61         | 0.568 | 18.615                                      | 6.449   |
| 20         | 0.61         | 0.568 | 18.327                                      | 6.35    |
| 21         | 0.61         | 0.566 | 18.334                                      | 6.33    |
| 22         | 0.6          | 0.566 | 18.404                                      | 6.249   |
| 23         | 0.6          | 0.566 | 18.345                                      | 6.229   |
| 24         | 0.6          | 0.566 | 18.345                                      | 6.229   |
| 25         | 0.6          | 0.566 | 18.256                                      | 6.199   |
| 26         | 0.6          | 0.566 | 18.021                                      | 6.12    |
| 27         | 0.6          | 0.566 | 18.021                                      | 6.12    |
| 28         | 0.62         | 0.586 | 18.661                                      | 6.78    |
| 29         | 0.62         | 0.586 | 18.661                                      | 6.78    |
| 30         | 0.62         | 0.583 | 18.757                                      | 6.779   |
| 31         | 0.61         | 0.576 | 19.296                                      | 6.78    |
| 32         | 0.61         | 0.576 | 18.869                                      | 6.63    |
| 33         | 0.61         | 0.576 | 18.641                                      | 6.55    |
| 34         | 0.61         | 0.573 | 18.71                                       | 6.54    |
| 35         | 0.61         | 0.569 | 18.669                                      | 6.48    |
| 36         | 0.61         | 0.568 | 18.673                                      | 6.47    |
| 37         | 0.6          | 0.566 | 18.346                                      | 6.229   |
| 38         | 0.58         | 0.544 | 18.16                                       | 5.73    |
| 39         | 0.58         | 0.544 | 17.97                                       | 5.669   |
| 40         | 0.62         | 0.588 | 18.597                                      | 6.779   |
